# Supplementary material for: Tumors attenuating the mitochondrial activity in T cells escape from PD-1 blockade therapy
Source: eLife journal article supplement (doi:10.7554/elife.52330), 2020-03-02
Supplement: supp [file elife-52330-supp-v1.zip]

Figure 1-figure supplement 2

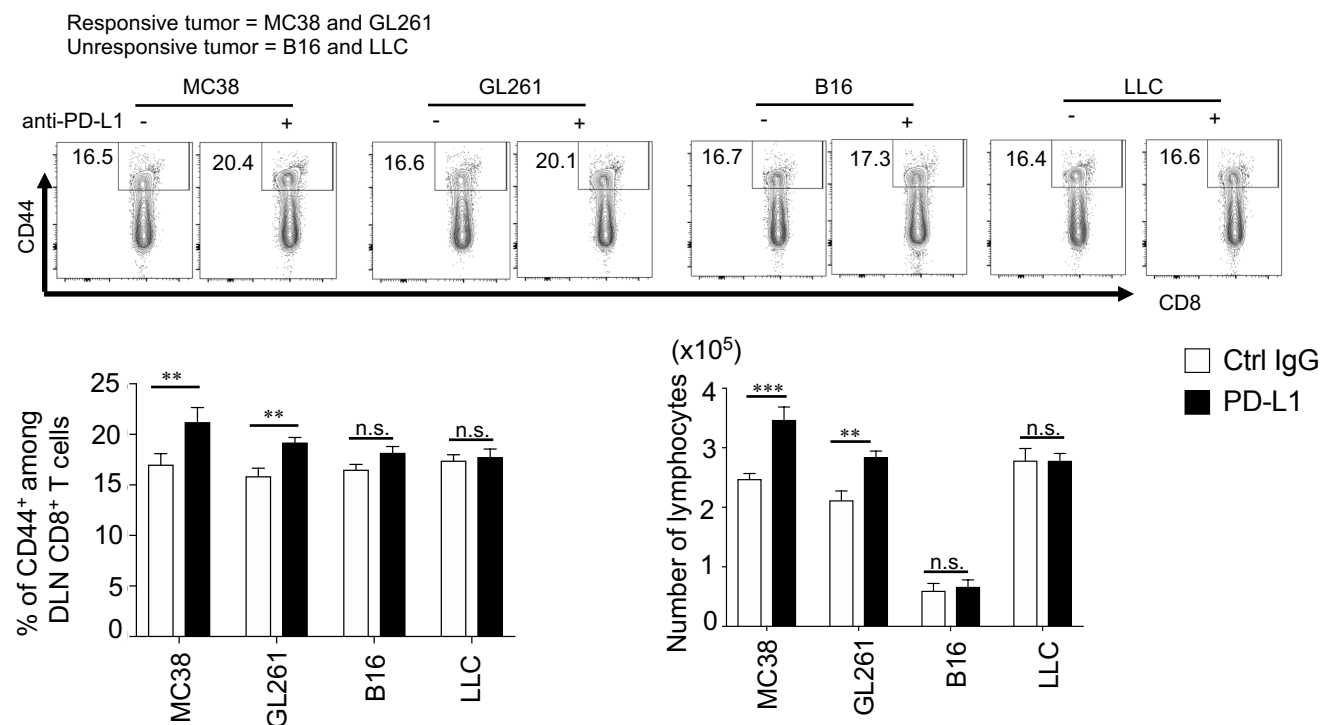

**Figure 1-figure supplement 2. Increment of CD44<sup>+</sup> CD8<sup>+</sup> T cells in DLN after PD-1 blockade in the hosts with responsive tumor.** Related with Figure 1C. CD8<sup>+</sup> DLN cells were gated for CD44<sup>+</sup>. Representative FACS pattern for each group is shown in upper panel. CD44<sup>+</sup> frequency (lower panel, left figure) and absolute number (lower panel, right figure) were quantified. Data represent the means  $\pm$  SEM of 5 mice. \*\* $p < 0.01$ , \*\*\* $p < 0.001$ , one-way ANOVA analysis. Data are representative of three independent experiments. n.s. represents 'not significant'.
