# Supplementary material for: Tumors attenuating the mitochondrial activity in T cells escape from PD-1 blockade therapy
Source: eLife journal article supplement (doi:10.7554/elife.52330), 2020-03-02
Supplement: supp [file elife-52330-supp-v1.zip]

Figure 6-figure supplement 1

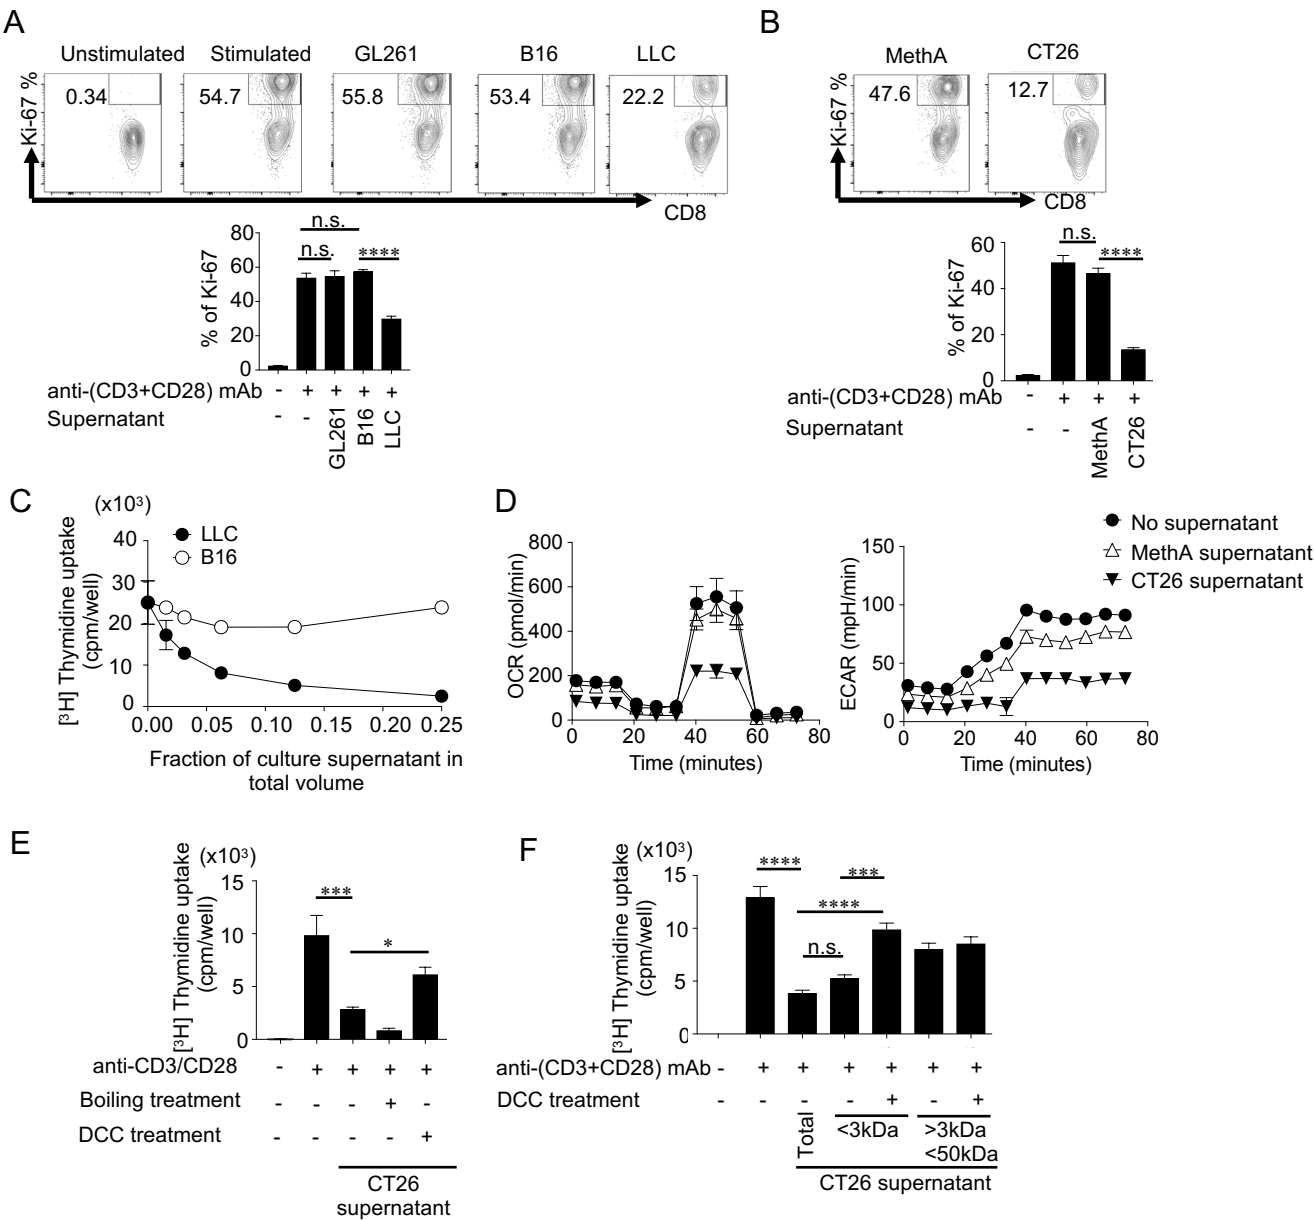

**Figure 6-figure supplement 1. Tumor-derived suppressive factor inhibits proliferation and mitochondrial function of CD8<sup>+</sup> T cells *in vitro*.** As per schedule mentioned in Figure 6A, naïve CD8<sup>+</sup> T cells were stimulated in the presence of culture supernatant. **(A-B)** Naïve CD8<sup>+</sup> T cells were stimulated in the presence of culture supernatant of tumor cells from C57BL/6N **(A)** or BALB/c **(B)** background. Ki-67 expression was analyzed intracellularly by flow cytometry. Representative FACS profile (upper panel) and frequency of CD8<sup>+</sup> Ki-67<sup>+</sup> T cells (lower panel) are shown. Control groups are shared between **A** and **B**. **(C)** Naïve CD8<sup>+</sup> T cells were stimulated in the presence of serially diluted culture supernatants from B16 and LLC. T cell proliferation was measured by <sup>3</sup>H-thymidine incorporation assay. **(D)** OCR (left) and ECAR (right) were measured of naïve CD8<sup>+</sup> T cells that were stimulated in the presence of culture supernatant from MethA and CT26. **(E)** CT26 supernatant was heat-inactivated to denature protein components. To remove small molecules, supernatant was treated with DCC. The effect of treated supernatant on naïve CD8<sup>+</sup> T cell proliferation was assessed. **(F)** Using different cut-off filters, CT26 supernatant was fractionated into <3kDa and <50kDa fraction that were further treated with DCC. The effect of treated fractions on naïve CD8<sup>+</sup> T cell proliferation was assessed. Data represent the means ± SEM of triplicate wells. \**p* < 0.05, \*\*\**p* < 0.001, \*\*\*\**p* < 0.0001, one-way ANOVA analysis. Data are representative of three independent experiments. n.s. represents 'not significant'.
