# Supplementary material for: Tumors attenuating the mitochondrial activity in T cells escape from PD-1 blockade therapy
Source: eLife journal article supplement (doi:10.7554/elife.52330), 2020-03-02
Supplement: supp [file elife-52330-supp-v1.zip]

Figure 6-figure supplement 4

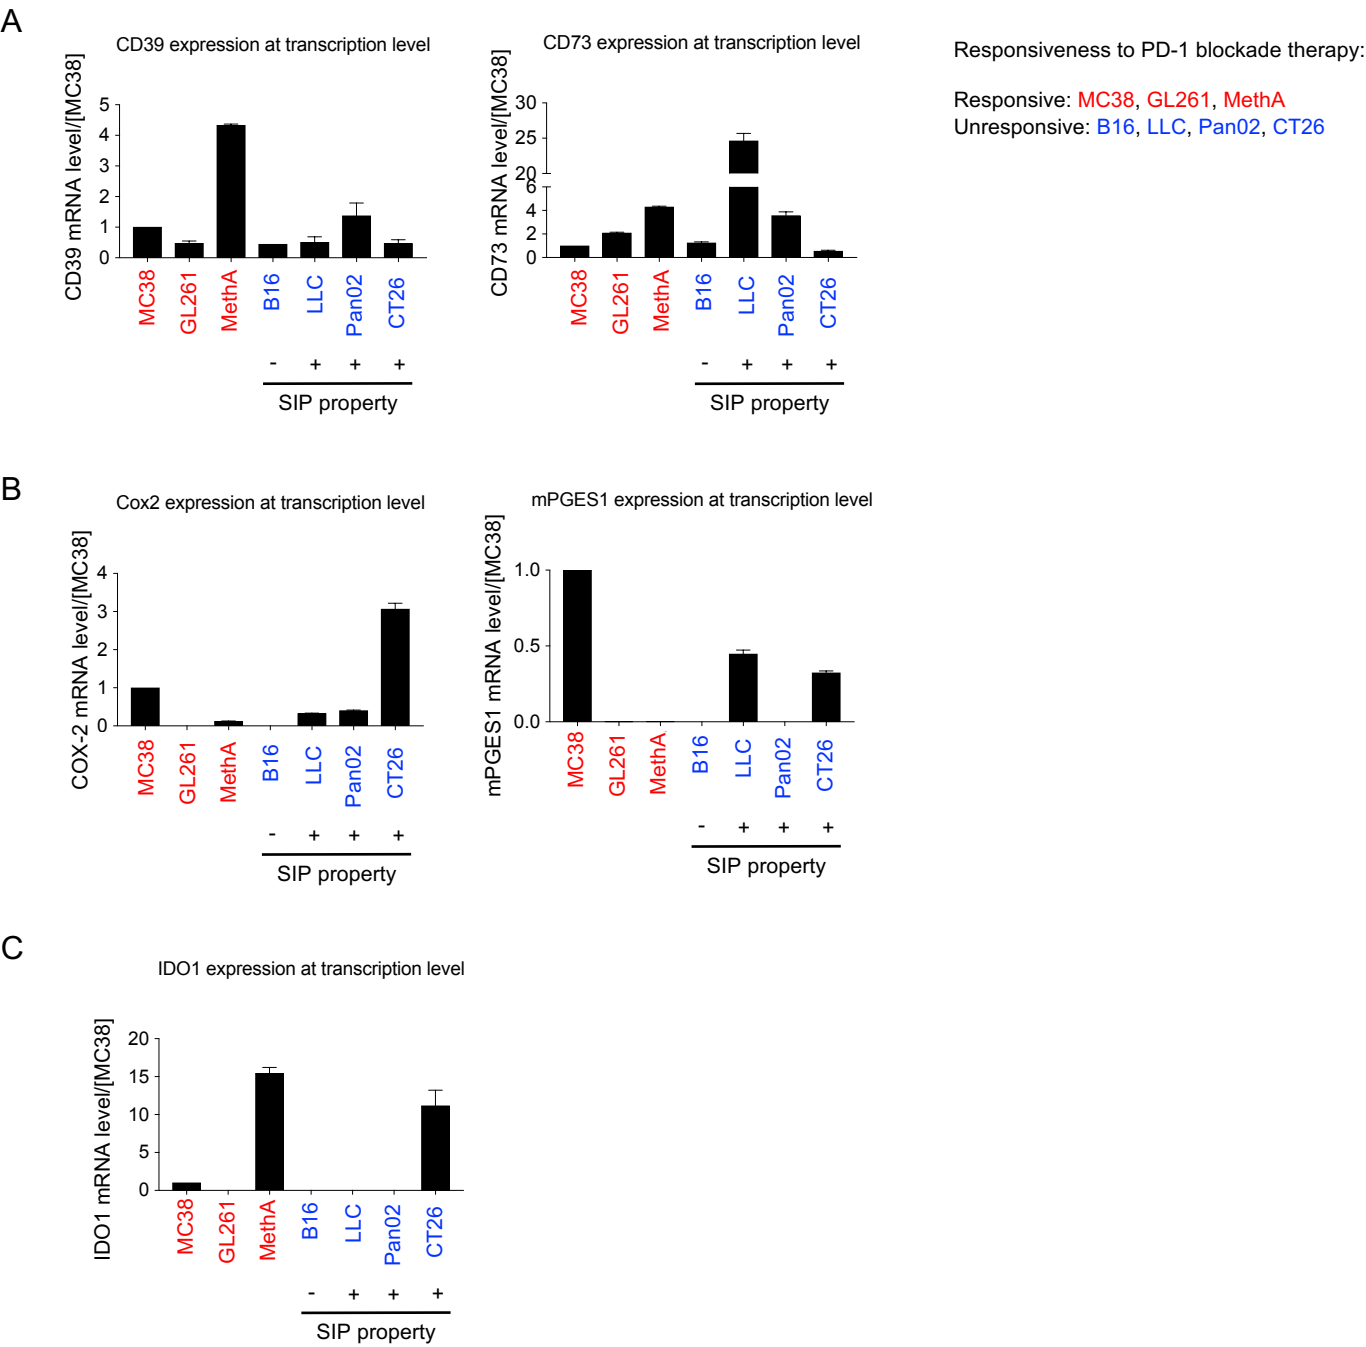

**Figure 6-figure supplement 4. Previously reported factors are not related with the nature of SIP-positive tumors.** Expression levels of immune suppression-associated genes were examined by quantitative PCR (qPCR) in different tumor cell lines. Tumor names in red and blue are responsive and unresponsive, respectively. **(A)** Expression of CD39 (left) and CD73 (right) were quantified. **(B)** Expression of Cox2 (left) and mPGES1 (right) were quantified. **(C)** Expression of IDO1 was quantified. Data represent the means  $\pm$  SEM of 3 wells assuming the expression in MC38 = 1 in qRT-PCR analysis. Data are representative of 3 independent experiments. Murine  $\beta$ -actin was taken as internal control during qRT-PCR analysis.
