# Supplementary material for: Tumors attenuating the mitochondrial activity in T cells escape from PD-1 blockade therapy
Source: eLife journal article supplement (doi:10.7554/elife.52330), 2020-03-02
Supplement: supp [file elife-52330-supp-v1.zip]

## Figure 1-figure supplement 1

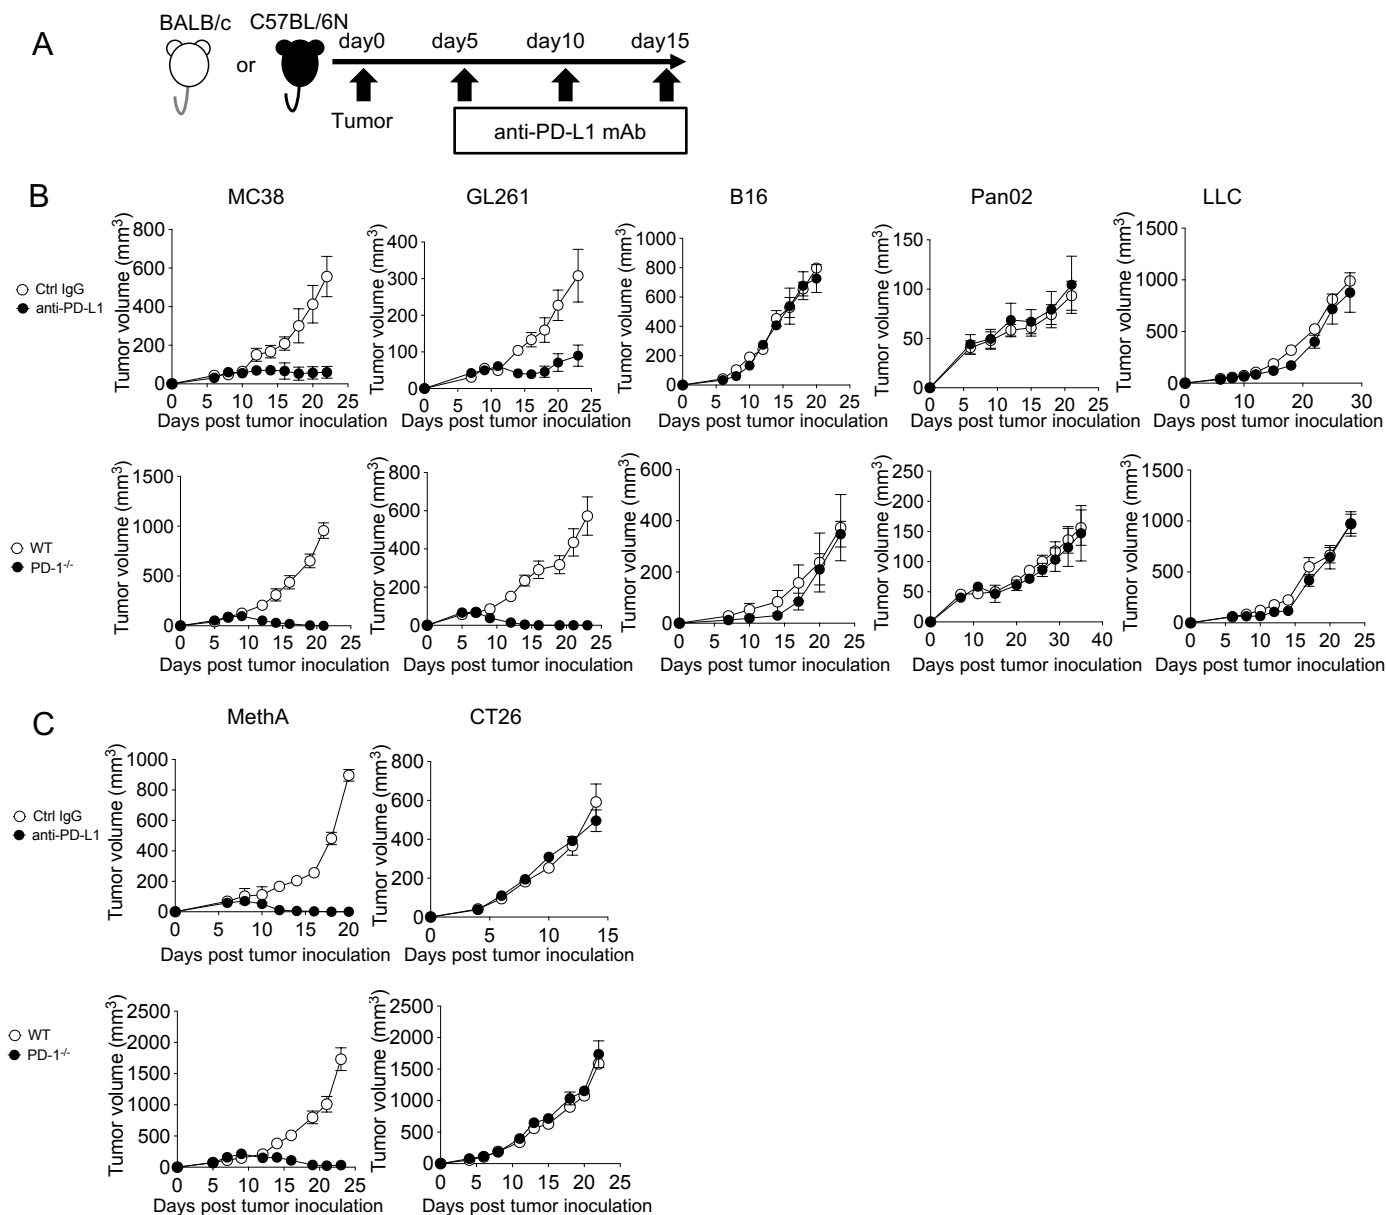

**Figure 1-figure supplement 1. Stratification of responsive and unresponsive tumors in C57BL/6N and BALB/c genetic backgrounds.** (A) Schematic diagram of the PD-1 blockade therapy. Tumor size was measured on every alternative day. (B-C) Tumor growth were measured in anti-PD-L1 mAb treatment model (top panel) or genomic PD-1<sup>-/-</sup> model (bottom panel) in C57BL/6N (B) and BALB/c (C) background. Data represent the means  $\pm$  SEM of five or six mice. Data are representative of three independent experiments.
