# Supplementary material for: Tumors attenuating the mitochondrial activity in T cells escape from PD-1 blockade therapy
Source: eLife journal article supplement (doi:10.7554/elife.52330), 2020-03-02
Supplement: supp [file elife-52330-supp-v1.zip]

Figure 6-figure supplement 2

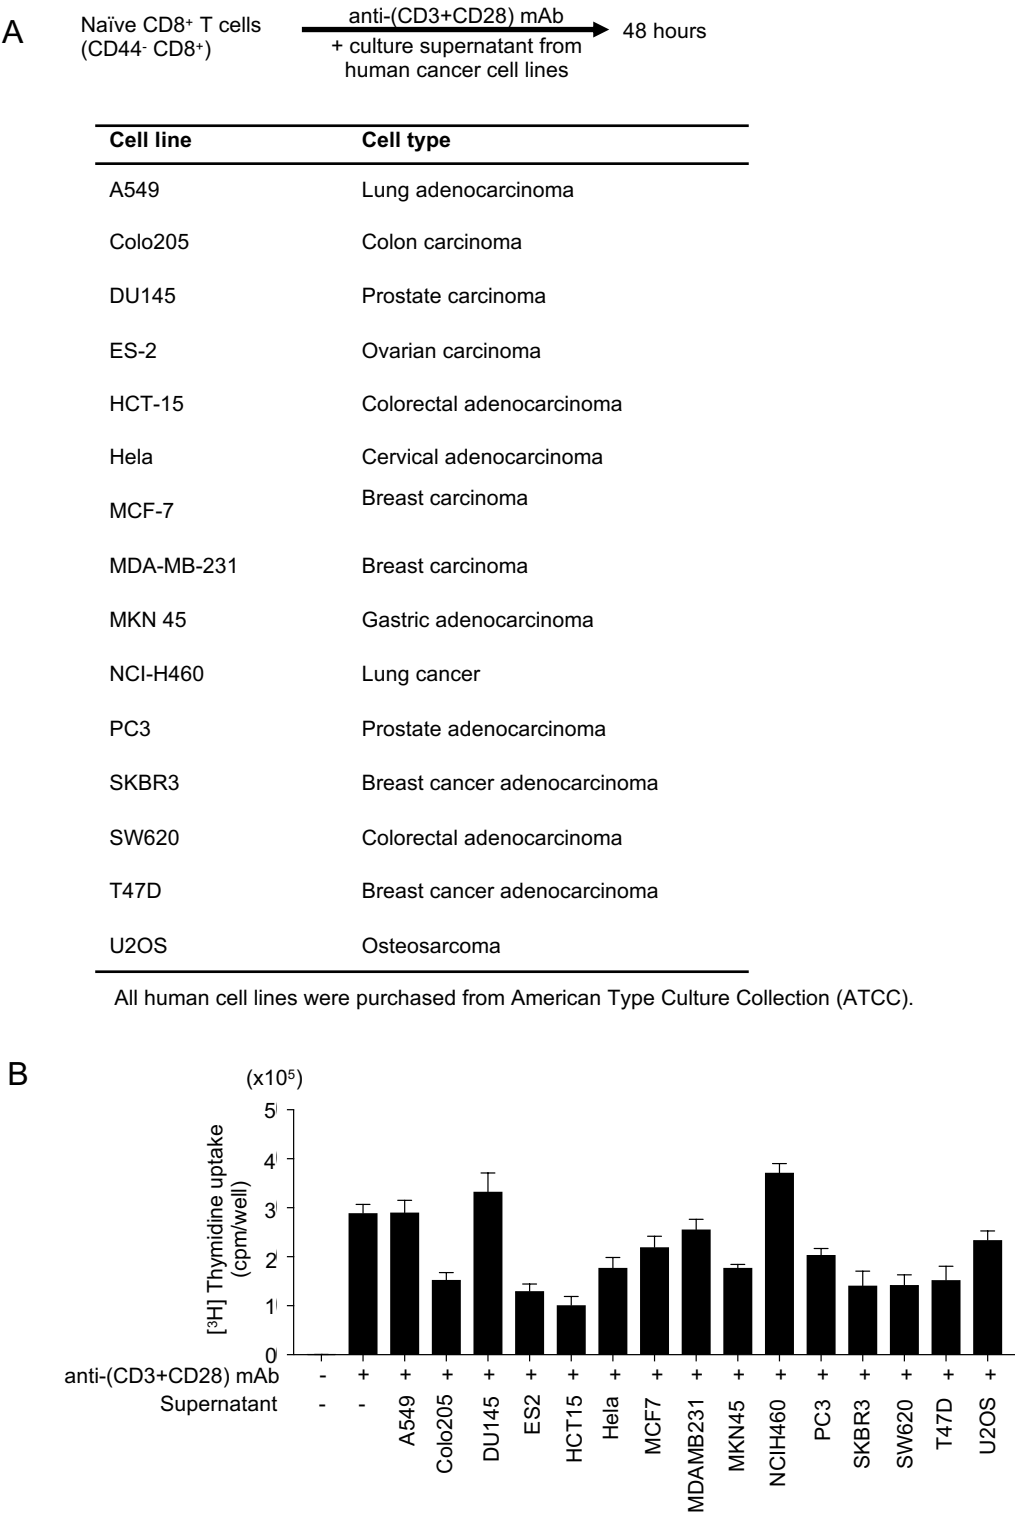

**Figure 6-figure supplement 2. Some human cancer cell lines release suppressive factors which inhibit T cells proliferation *in vitro*.** (A) Schedule of *in vitro* T cell proliferation assay (upper panel). Murine naïve CD8<sup>+</sup> T cells were stimulated for 48 hrs with anti-(CD3+CD28) mAb in the presence of culture supernatants collected from different human cancer cell lines cultures. Details of different human cancer cell lines are shown (lower panel). (B) Proliferation was assessed by thymidine incorporation assay. Data represent the means ± SEM of triplicate wells. Data are representative of three independent experiments.
