# Supplementary material for: Tumors attenuating the mitochondrial activity in T cells escape from PD-1 blockade therapy
Source: eLife journal article supplement (doi:10.7554/elife.52330), 2020-03-02
Supplement: supp [file elife-52330-supp-v1.zip]

Figure 7-figure supplement 1

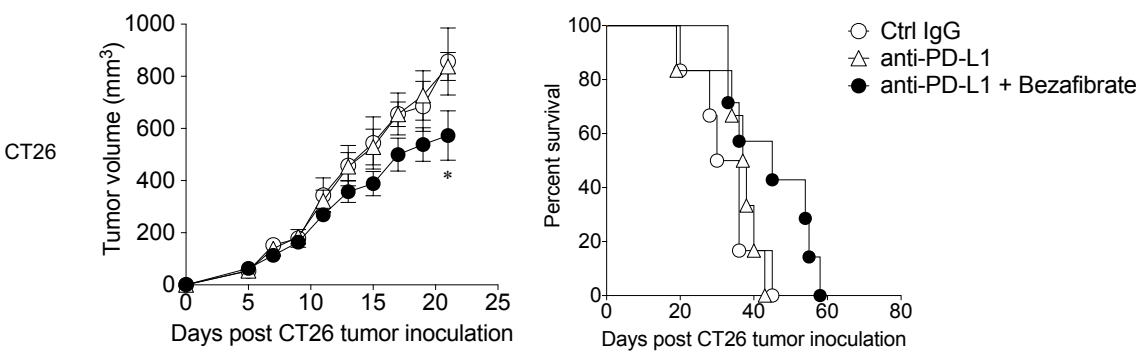

**Figure 7-figure supplement 1. Enhancing mitochondrial activation by bezafibrate chemicals improves the anti-tumor effect for SIP-positive tumor in BALB/c background.** SIP-positive CT26 tumor was injected in mice and therapy was given as per schedule mentioned in Figure 7B. Tumor size (left) and survival (right) of CT26 tumor-bearing host are shown. Data represent the means  $\pm$  SEM of five mice. \* $p < 0.05$ , one-way ANOVA analysis. Data are representative of three independent experiments.
