# Supplementary material for: Tumors attenuating the mitochondrial activity in T cells escape from PD-1 blockade therapy
Source: eLife journal article supplement (doi:10.7554/elife.52330), 2020-03-02
Supplement: supp [file elife-52330-supp-v1.zip]

Figure 3-figure supplement 1

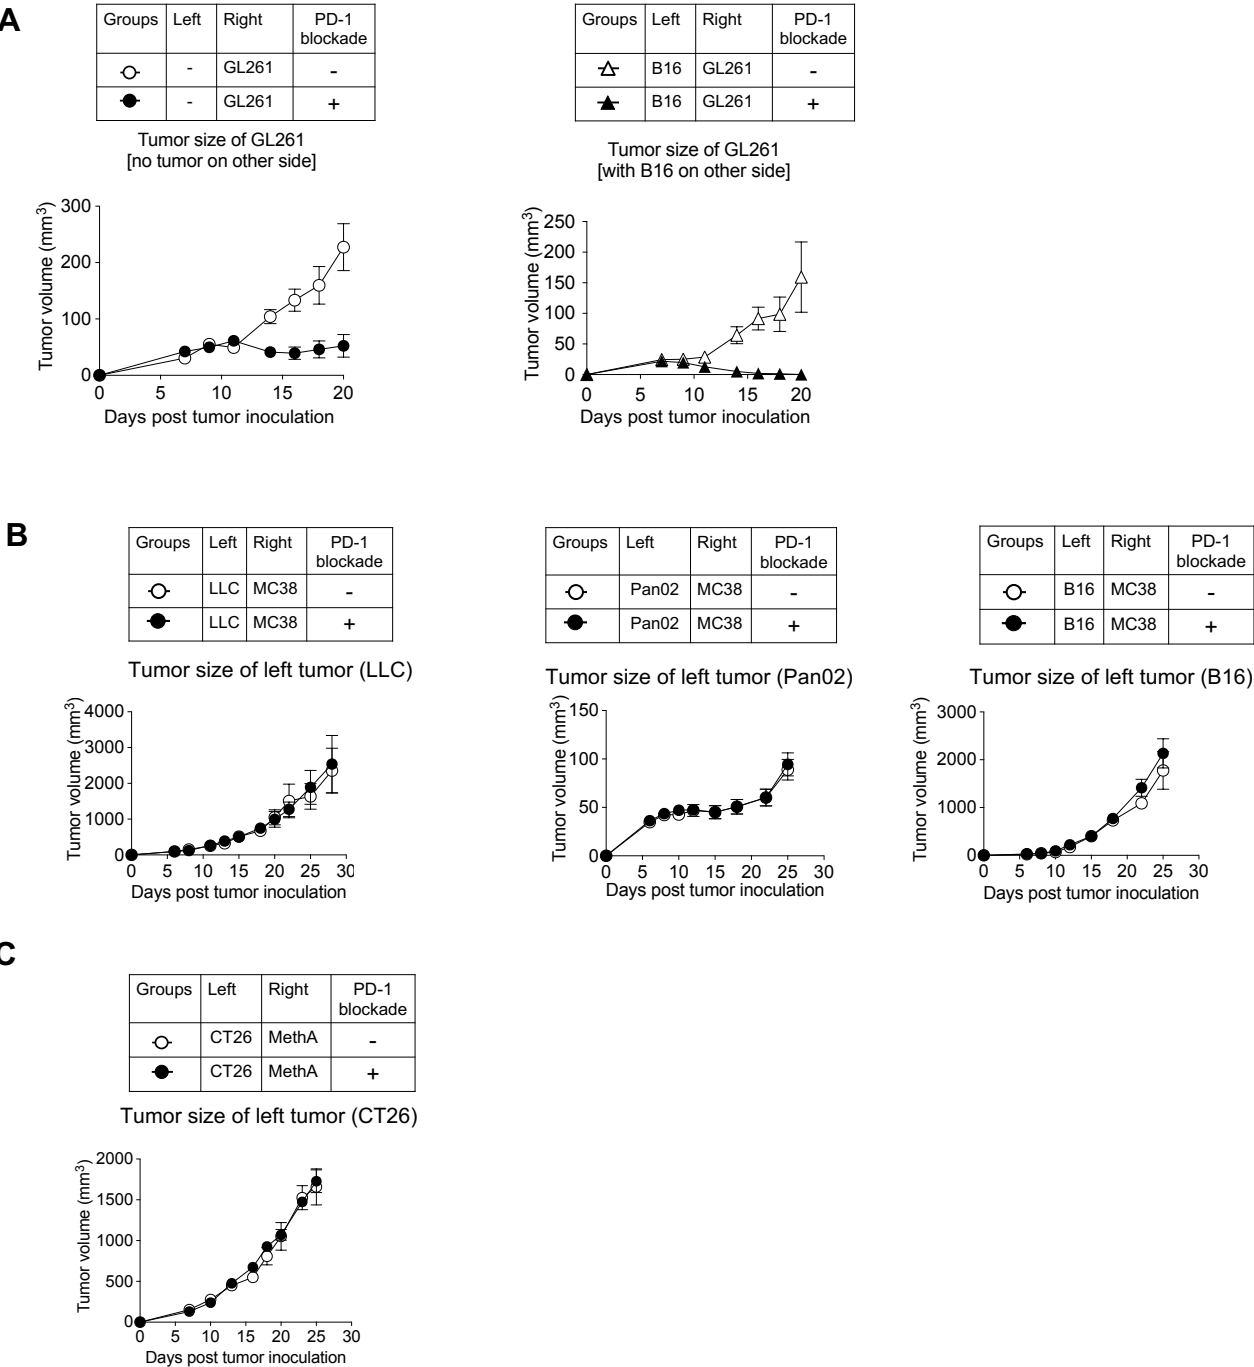

**Figure 3-figure supplement 1. Unresponsive tumors can be classified into systemically immunosuppressive or non-immunosuppressive tumors. (A)** Unresponsive tumor (B16) and responsive tumor (GL261) were injected and therapy were given as per the schedule mentioned in Figure 3A. Tumor growth of right responsive tumor (GL261) with or without PD-1 blockade was compared when no tumor (left panel) or in the presence of B16 (right panel) on left side. **(B and C)** Unresponsive tumor growth on left side of Figure 3B or C are shown. Data represent the means  $\pm$  SEM of five mice. Data are representative of two independent experiments.
