# Supplementary material for: Tumors attenuating the mitochondrial activity in T cells escape from PD-1 blockade therapy
Source: eLife journal article supplement (doi:10.7554/elife.52330), 2020-03-02
Supplement: supp [file elife-52330-supp-v1.zip]

## Figure 1-figure supplement 3

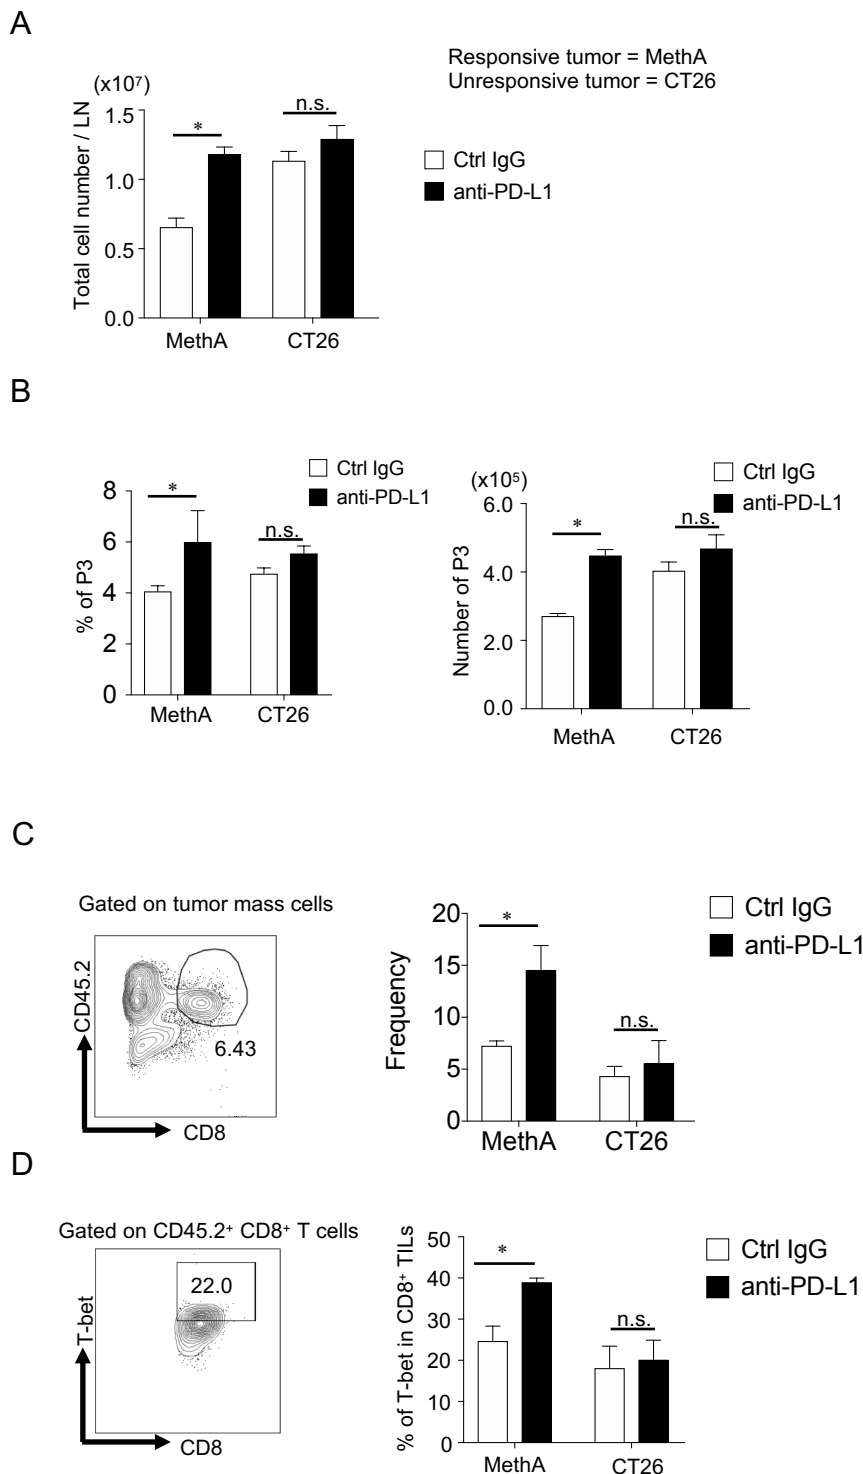

**Figure 1-figure supplement 3. Higher immune responses in responsive tumor-bearing host after PD-1 blockade compared to unresponsive group in BALB/c background.** Following the experimental schedule as mentioned in Figure 1A, mice were sacrificed on day 12 for analysis of immune responses. **(A)** Absolute number of lymphocytes per LN were compared between responsive and unresponsive tumor-bearing hosts. **(B)** DLN cells were stained with anti-CD8, anti-CD62L, and anti-CD44 antibodies. Frequency (left) and absolute number (right) of effector memory CD8<sup>+</sup> T cells (P3 population) were calculated. **(C-D)** Cells after tumor digestion were stained with anti-CD8 and anti-CD45.2 mAb. Representative FACS pattern of CD45.2<sup>+</sup> CD8<sup>+</sup> CTLs from MethA-bearing mice treated with ctrl IgG group is shown (left). The frequency of CD45.2<sup>+</sup> CD8<sup>+</sup> CTLs was compared between responsive and unresponsive tumor-bearing hosts (right) **(C)**. Following surface staining, T-bet was stained intranuclearly. Representative FACS pattern from MethA-bearing mice treated with ctrl IgG group (left) and the bar graph of frequency of T-bet expression are shown (right) **(D)**. Data represent the means  $\pm$  SEM of five or six mice. \* $p < 0.05$ , one-way ANOVA analysis. Data are representative of two independent experiments. n.s. represents 'not significant'.
