# Supplementary figures and images for: Tumors attenuating the mitochondrial activity in T cells escape from PD-1 blockade therapy
Source: eLife journal article supplement (doi:10.7554/elife.52330), 2020-03-02

A

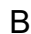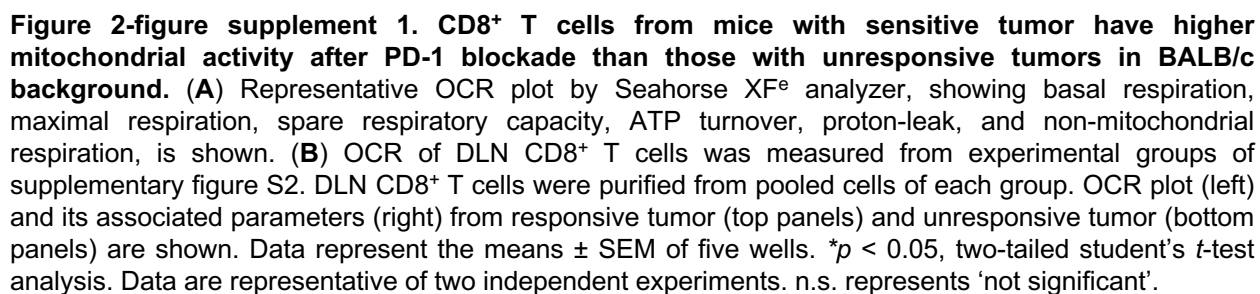

Supplement: supp [file elife-52330-supp-v1.zip]
